# Supplementary material
Source: Springer Nature journal article supplement (https://www.springermedizin.de/resource/supplementary/12943_2012_1039_MOESM1_ESM.pdf/9552134)

***In Vitro*****A431 cell*****In Vivo*****A431 xenografts**

|                                  |   |   |    |   |     |
|----------------------------------|---|---|----|---|-----|
| Panitumumab ( $\mu\text{g/mL}$ ) | – | – | 10 | 2 | 0.5 |
| EGF (100 ng/mL)                  | – | + | +  | + | +   |

|                          |   |   |   |
|--------------------------|---|---|---|
| Panitumumab (mg)         | – | – | 1 |
| EGF (100 $\mu\text{g}$ ) | – | + | + |

anti-pTYR

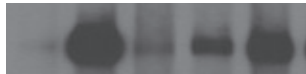

anti-EGFR

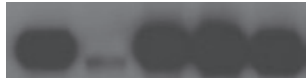

anti-pTYR

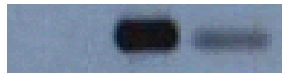

anti-EGFR

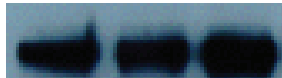

Supplement: MOESM1 [file 9552134]
